# Supplementary material for: ACSL1 promotes imatinib-induced chronic myeloid leukemia cell senescence by regulating SIRT1/p53/p21 pathway
Source: PubMed Central journal article supplement (PMC9606008; doi:10.1038/s41598-022-21009-6), 2022-10-26
Supplement: 41598_2022_21009_MOESM1_ESM.pdf [file 41598_2022_21009_MOESM1_ESM.pdf]

## **ACSL1 promotes imatinib-induced chronic myeloid leukemia cell senescence by regulating SIRT1/p53/p21 pathway**

Wen Liu<sup>1</sup>, Xiaoying Zhu<sup>1</sup>, Ling Tang<sup>1</sup>, Na Shen<sup>2</sup>, Fanjun Cheng<sup>1\*</sup>, Ping Zou<sup>1</sup>, Yong You<sup>1</sup>, Guolin Yuan<sup>3\*</sup>, Qing Li<sup>4\*</sup>, Xiaojian Zhu<sup>5</sup>

<sup>1</sup>Institute of Hematology, Union Hospital, Tongji Medical College, Huazhong University of Science and Technology, Wuhan 430022, China

<sup>2</sup>Department of Hematology, The First Affiliated Hospital of Zhengzhou University, Zhengzhou 450000, China

<sup>3</sup>Department of Hematology, Affiliated Hospital of Hubei University of Arts and Science, Xiangyang, China

<sup>4</sup>Department of Hematology, Wuhan No.1 Hospital, Wuhan 430000, China

<sup>5</sup>Department of Hematology, Tongji Hospital, Tongji Medical College, Huazhong University of Science and Technology, Wuhan 430030, China

### **Corresponding authors:**

**Qing Li**, Department of Hematology, Wuhan No.1 Hospital, Wuhan 430000, China. E-mail: liqing54070907@163.com; Telephone: +86 13627100960.

**Guolin Yuan**, Affiliated Hospital of Hubei University of Arts and Science, Department of Hematology, Xiangyang Hubei, China. E-mail: yuanguo1973@163.com.

**Fanjun Cheng**, Institute of Hematology, Union Hospital, Tongji Medical College, Huazhong University of Science and Technology, No.1277 Jiefang Road, Wuhan 430022, China. Email: chengfanjun001@sina.com. Telephone: +86 13807186956.

Figure S1

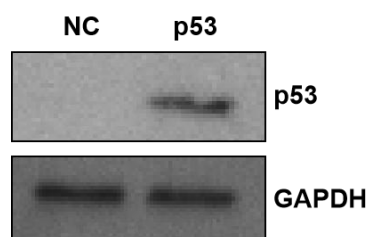

Fig. S1. p53 expression K562 cells. Western blot analysis of p53 in K562 cells.

Table S1. Primer sequences.

| Amplicon | Primer FW (5'-3')         | Primer RV (5'-3')         |
|----------|---------------------------|---------------------------|
| ACSL1    | CTTATGGGCTTCGGAGCTTTT     | CAAGTAGTGCGGATCTTCGTG     |
| p16      | TTCGCTAAGTGCTCGGAGTTAATAG | ACCCTGTCCCTCAAATCCTCTG    |
| p21      | CACTCCAAACGCCGGCTGATCTTC  | TGTAGAGCGGGCCTTTGAGGCCCTC |
| p53      | CTTTGAGGTGCGTGTTTGTGC     | GGTTTCTTCTTTGGCTGGGGA     |
| SIRT1    | GAGTGGCAAAGGAGCAGA        | TCTGGCATGTCCCACTATC       |
| MDM2     | GAATCATCGGACTCAGGTACATC   | TCTGTCTCACTAATTGCTCTCCT   |
| GAPDH    | GGGAGCCAAAAGGGTCATCA      | TGATGGCATGGACTGTGGTC      |

Figure S2

Figure 1i

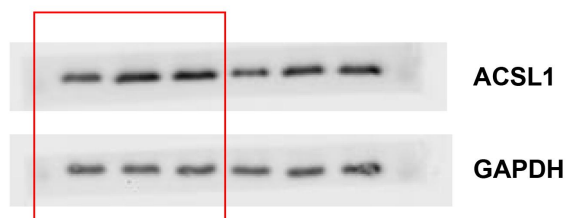

Supplementary Figure S2.

Gels and blots which are shown cropped in Figure 1i. Note: The blot was cut into multiple strips following the protein transfer. The edges of the PVDF membrane are visible. Here, bands containing the 60-90 kDa and 20-40 kDa regions were imaged, respectively.

Figure S3

Figure 2b

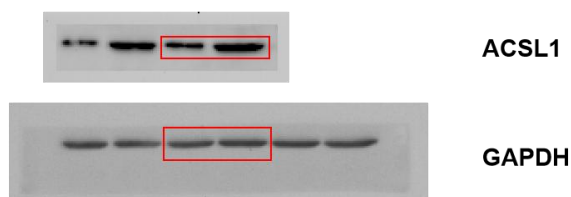

Supplementary Figure S3.

Gels and blots which are shown cropped in Figure 2b. Note: The blot was cut into multiple strips following the protein transfer. The edges of the PVDF membrane are visible. Here, bands containing the 60-90 kDa and 20-40 kDa regions were imaged, respectively.

Figure S4

Figure 3b

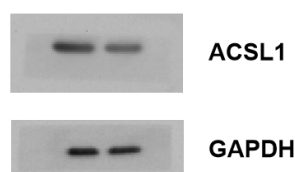

Supplementary Figure S4.

Gels and blots which are shown cropped in Figure 3b. Note: The blot was cut into multiple strips following the protein transfer. The edges of the PVDF membrane are visible. Here, bands containing the 60-90 kDa and 20-40 kDa regions were imaged, respectively.

Figure S5

Figure 4

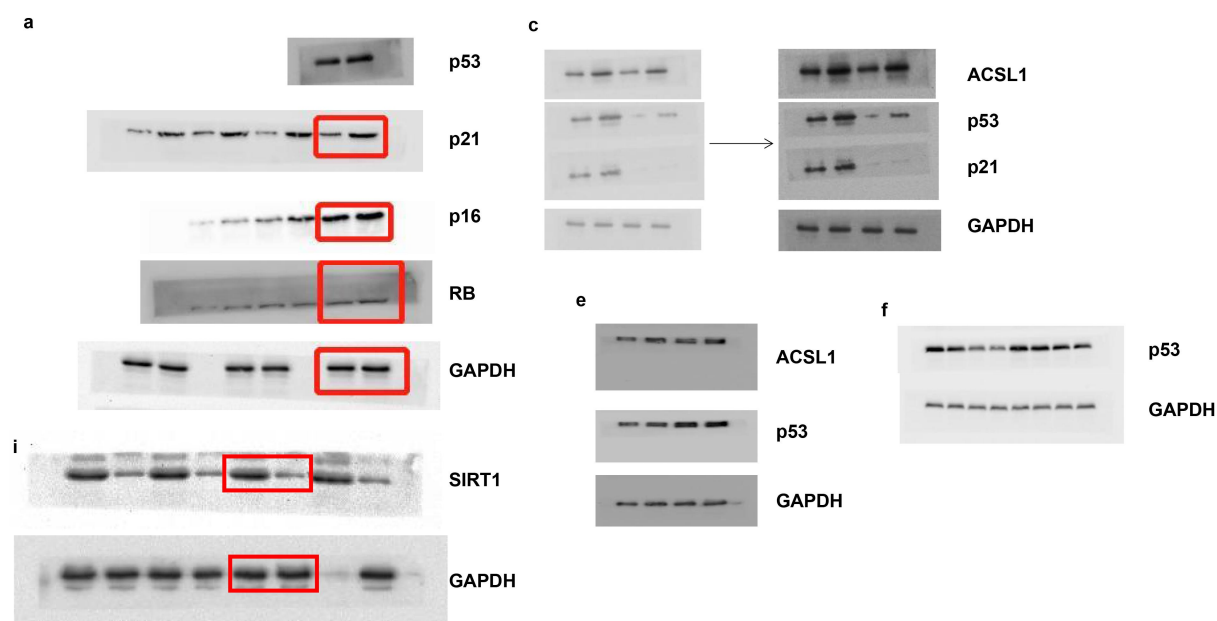

Supplementary Figure S5.

Gels and blots which are shown cropped in Figure 4a, c, e, f, i. Note: The blot was cut into multiple strips following the protein transfer. The edges of the PVDF membrane are visible. Here, bands containing the following regions were separately imaged: p53 (40-60 kDa), p21 (15-30 kDa), p16 (10-25 kDa), Rb (100-130 kDa), SIRT1 (100-130 kDa), ACSL1 (60-90 kDa) and GAPDH (20-40 kDa).

Figure S6

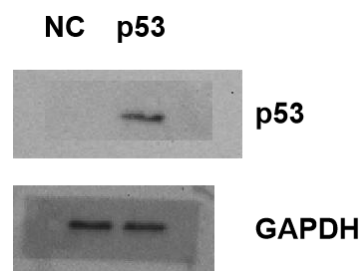

Supplementary Figure S6.

Gels and blots which are shown cropped in Figure S1. Note: The blot was cut into multiple strips following the protein transfer. The edges of the PVDF membrane are visible. Here, bands containing the 40-60 kDa and 20-40 kDa regions were imaged, respectively.
